# Supplementary material for: Cdk1 phosphorylation of the dynein adapter Nde1 controls cargo binding from G2 to anaphase
Source: PubMed Central journal article supplement — J Cell Biol. 2018 Sep 3;217(9):3019–29. doi: 10.1083/jcb.201707081 (PMC6122996; doi:10.1083/jcb.201707081), 2018-09-03
Supplement: JCB_201707081_sm.pdf [file JCB_201707081_sm.pdf]

Supplemental material

Wynne and Vallee, <https://doi.org/10.1083/jcb.201707081>

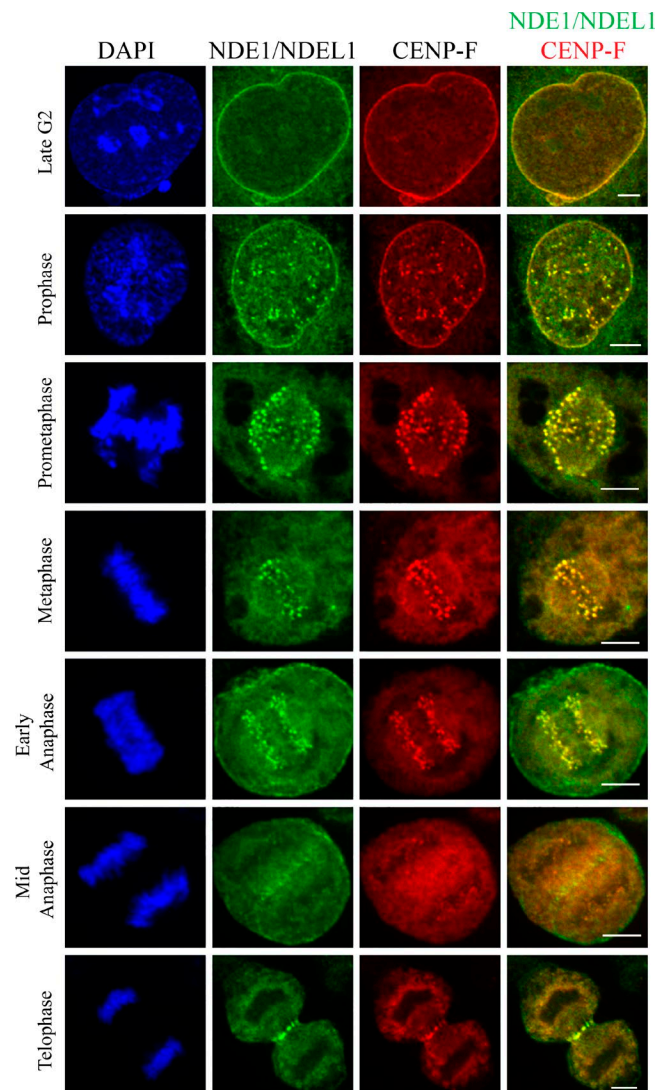

Figure S1. **Relative distribution of NDE1/NDEL1 and CENP-F during late G2 and mitosis.** HeLa cells were stained for endogenous NDE1/NDEL1 and CENP-F to determine their localization pattern. Endogenous NDE1/NDEL1 and CENP-F colocalized at the nuclear NE in G2 and at the kinetochore from prophase until mid-anaphase. Bars, 5  $\mu$ m.

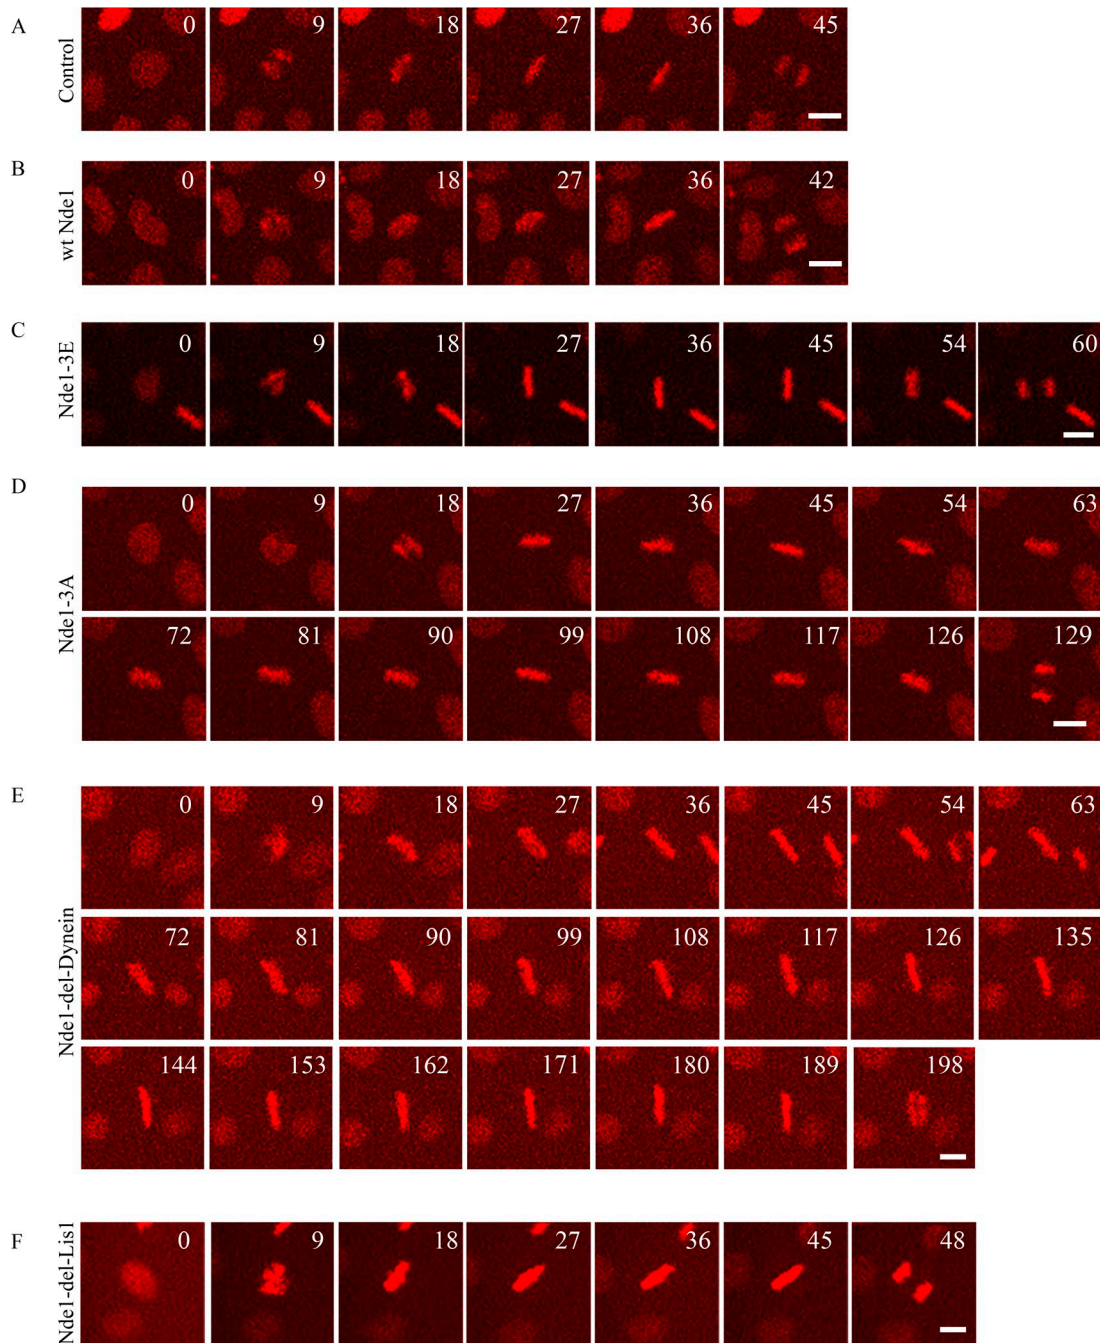

Figure S2. **Effect of in Nde1 mutants on chromosome behavior.** (A-F) Representative images from the live analysis of Fig. 4 (A-F) showing H2B-RFP HeLa cells expressing GFP, GFP WT Nde1, GFP Nde1 phosphomimetic, GFP Nde1 phosphomutant, GFP Nde1-del-dynein, or GFP Nde1-del-Lis1. Image panels represent time points that are 9 min apart. Bars, 10 μm.

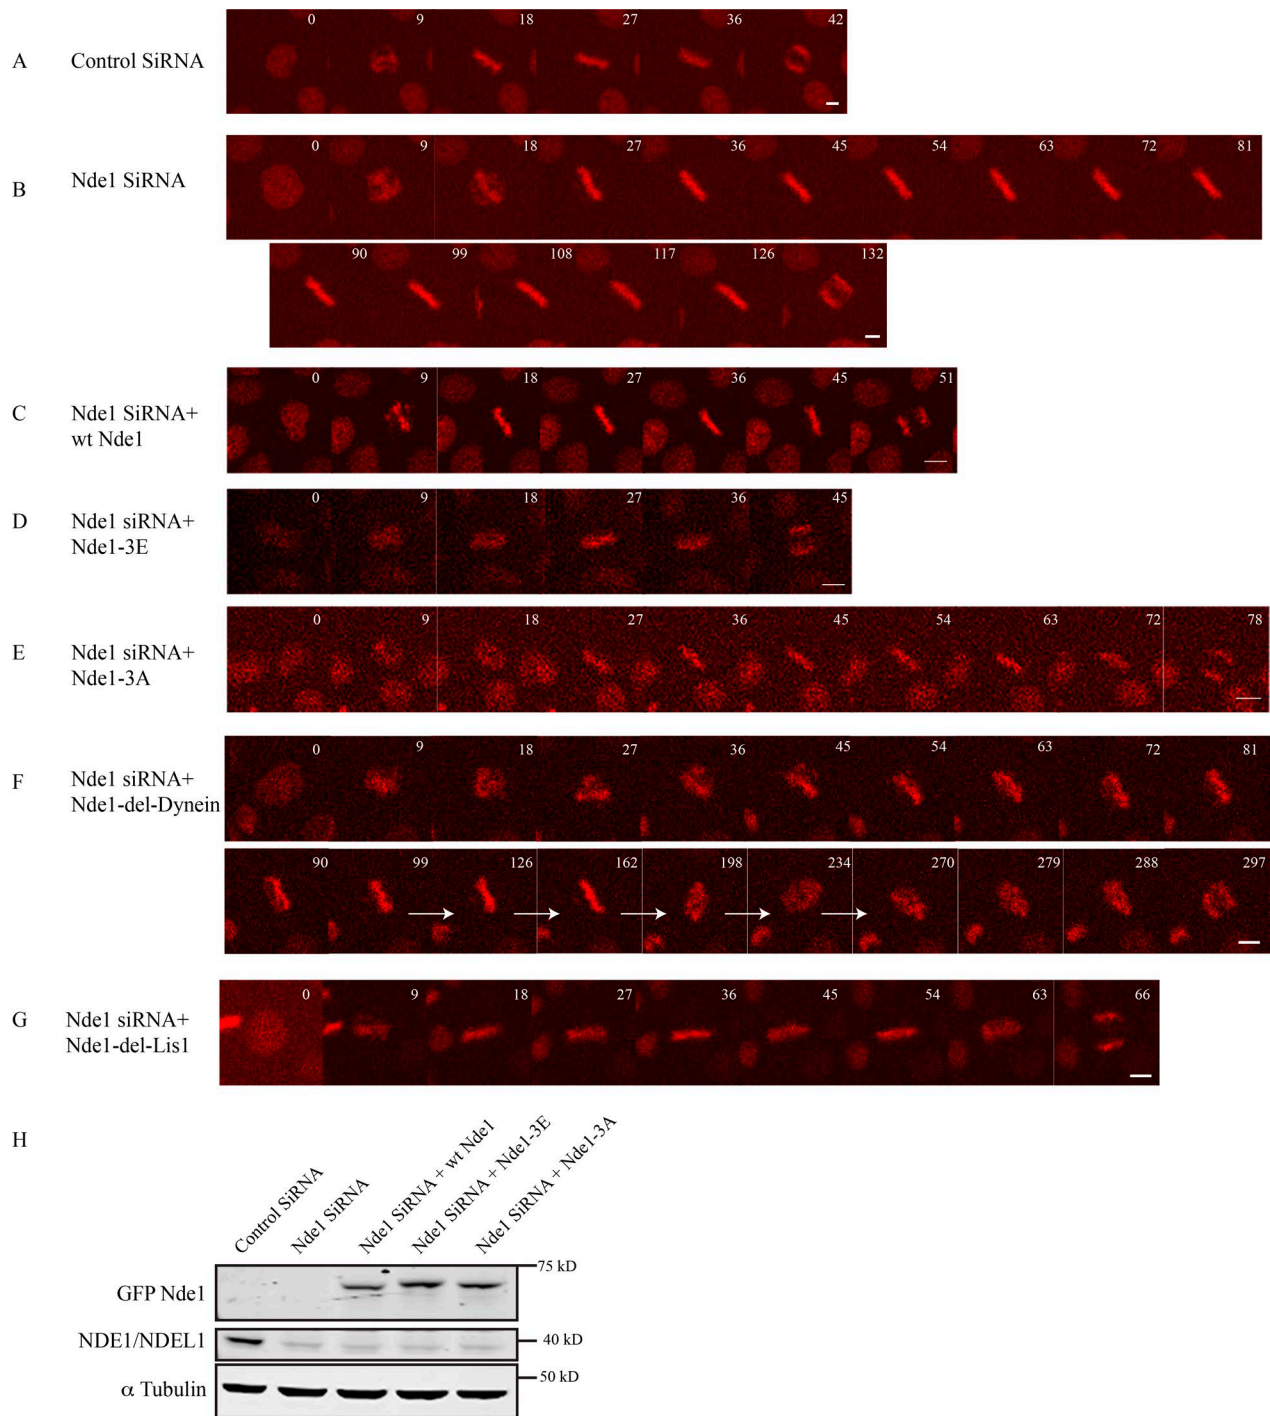

Figure S3. **Effect of Nde1 RNAi rescue on chromosome behavior.** (A–G) Representative images from the live analysis of Fig. 4 (H–N) showing H2B-RFP HeLa cells treated for 48 h with either control siRNA or Nde1 siRNA and then transfected with GFP, GFP WT Nde1, GFP Nde1-3E, GFP Nde1-3A, GFP Nde1-del-dynein, or GFP Nde1-del-Lis1. Bars, 10  $\mu$ m. (H) Western blot analysis of HeLa cell lysate treated for 48 h with control siRNA, Nde1 siRNA, or Nde1 siRNA rescued with GFP WT Nde1, GFP Nde1-3E, or GFP Nde1-3A confirms the successful reduction in Nde1 protein levels.
